# Supplementary material
Source: Springer Nature journal article supplement (https://www.springermedizin.de/resource/supplementary/13018_2014_420_MOESM5_ESM.pdf/9636996)
Supplement: MOESM5 [file 9636996]

Table 2

|         | Estimated primary responsible level | Operated levels |
|---------|-------------------------------------|-----------------|
| C3/4    | 0                                   |                 |
| C4/5    | 4 (11%)                             |                 |
| C5/6    | 11 (31%)                            |                 |
| C6/7    | 5 (14%)                             |                 |
| C7/T1   | 1 (3%)                              |                 |
| C3/4/5  | 0                                   | 2 (6%)          |
| C4/5/6  | 1 (3%)                              | 7 (20%)         |
| C5/6/7  | 12 (34%)                            | 23 (66%)        |
| C6/7/T1 | 1 (3%)                              | 3 (8%)          |
